1 **Negevirus reduce replication of alphaviruses during co-infection**

2

3 Edward I. Patterson<sup>1,2\*</sup>, Tiffany F. Kautz<sup>1†</sup>, Maria A. Contreras-Gutierrez<sup>1</sup>, Hilda

4 Guzman<sup>1</sup>, Robert B. Tesh<sup>1</sup>, Grant L. Hughes<sup>2</sup>, Naomi L. Forrester<sup>1,3</sup>

5

6 <sup>1</sup> Department of Pathology, University of Texas Medical Branch, Galveston, TX

7 77550, USA

8 <sup>2</sup> Departments of Vector Biology and Tropical Disease Biology, Centre for Neglected

9 Tropical Disease, Liverpool School of Tropical Medicine, Liverpool L3 5QA, UK

10 <sup>3</sup> School of Life Sciences, University of Keele, Keele ST5 5BG, UK

11 † Current address: Glenn Biggs Institute for Alzheimer's and Neurodegenerative

12 Diseases, UT Health San Antonio, San Antonio, TX 78229, USA

13 \* Corresponding author: [ian.patterson@lstmed.ac.uk](mailto:ian.patterson@lstmed.ac.uk)

14 **Abstract**

15           Negevirus are a group of insect-specific virus (ISV) that have been found in  
16 many arthropods. Their presence in important vector species led us to examine  
17 their interactions with arboviruses during co-infections. Wild-type negevirus  
18 reduced the replication of Venezuelan equine encephalitis virus (VEEV) and  
19 chikungunya virus (CHIKV) during co-infections in mosquito cells. Negevirus  
20 (NEGV) isolates were also used to express GFP and anti-CHIKV antibody fragments  
21 during co-infections with CHIKV. NEGV expressing anti-CHIKV antibody fragments  
22 was able to further reduce replication of CHIKV during co-infections, while  
23 reductions of CHIKV with NEGV expressing GFP were similar to titers with wild-type  
24 NEGV alone. These results are the first to show that negevirus induce  
25 superinfection exclusion of arboviruses, and to demonstrate a novel approach to  
26 deliver anti-viral antibody fragments with paratransgenic ISVs. The ability to inhibit  
27 arbovirus replication and express exogenous proteins in mosquito cells make  
28 negevirus a promising platform for control of arthropod-borne pathogens.

## 29 **Introduction**

30 Many insect-specific viruses (ISVs) have been discovered in wild-caught and  
31 laboratory colonies of mosquitoes and in mosquito cell cultures [1]. ISVs are only  
32 known to replicate in arthropods or insect cell lines. While posing no threat to  
33 human or animal health, ISVs may affect the transmission of more dangerous  
34 vector-borne pathogens. Highly insect-pathogenic ISVs have been suggested for use  
35 as biological control agents to reduce populations of vector competent mosquitoes  
36 [2-4]. Several recent studies have demonstrated that ISVs may play a more direct  
37 role by inhibiting the replication of arboviruses within the insect host. The majority  
38 of these experiments have attempted to define a relationship based on  
39 superinfection exclusion, a phenomenon in which an established virus infection  
40 interferes with a secondary infection by a closely related virus. For example, insect-  
41 specific flaviviruses, such as cell fusing agent virus (CFAV), Nhumirim virus (NHUV)  
42 and Palm Creek virus (PCV) have demonstrated an ability to reduce viral loads of  
43 vertebrate pathogenic flaviviruses, like West Nile virus (WNV), Zika virus (ZIKV),  
44 dengue virus (DENV), Japanese (JEV) and St. Louis encephalitis (SLEV) viruses [5-  
45 10]. Similarly, the insect-specific alphavirus Eilat virus (EILV) was shown to reduce  
46 or slow replication of the pathogenic alphaviruses chikungunya virus (CHIKV),  
47 Sindbis virus (SINV), eastern (EEEV), western (WEEV) and Venezuelan equine  
48 encephalitis (VEEV) viruses in cell culture or in mosquitoes [11]. Less information is  
49 available about the effect of unrelated viruses during superinfection. Cell cultures  
50 chronically infected with *Aedes albopictus* densovirus (AalDNV) limit replication of  
51 DENV [12], and cell cultures with established CFAV and Phasi Charoen-like virus

52 (PCLV) infections reduced ZIKV and DENV replication [13]. The mechanism for  
53 these reduced titers has not been elucidated, but the relationships appear to be  
54 virus specific and even host specific [5, 14, 15].

55         The genus *Negevirus* is a recently discovered, unclassified group of ISVs [16].  
56 Members of this genus have been isolated from several species of hematophagous  
57 mosquitoes and sandflies, and negev-like viruses have also been found in other non-  
58 vector insects [17-24]. Phylogenetic studies have placed this group of viruses most  
59 closely to members of the genus *Cilevirus*, plant pathogens that are transmitted by  
60 mites [16, 23]. These viruses have a single-stranded, positive-sense RNA genome of  
61 ~9-10 kb, and contain three open reading frames (ORFs) [16]. The ORFs encode for  
62 the replication machinery (ORF1), a putative glycoprotein (ORF2), and a putative  
63 membrane protein (ORF3). Electron microscopy has shown the structural proteins  
64 to be arranged in a hot air balloon morphology, a round particle with a single  
65 protrusion that is likely the glycoprotein structure [25-27]. Little is known about the  
66 infectivity, transmission dynamics, and species range of negeviruses. However, they  
67 are commonly found in field collected mosquitoes [28, 29].

68         The association of negeviruses with important vector species over a wide  
69 geographical range raises the question of possible interactions or interference of  
70 negeviruses with vertebrate pathogenic viruses. Few studies exist that demonstrate  
71 the ability of unrelated viruses to induce superinfection exclusion, but evidence for  
72 this phenomenon with negeviruses could provide a platform to control vector-borne  
73 viral diseases in many arthropod vector species. In this study, three negevirus  
74 isolates from the Americas were assessed for superinfection exclusion in cell

75 cultures with CHIKV and VEEV. The use of a Negev virus (NEGV) infectious clone  
76 also allowed manipulation of the virus genome to provide a greater ability to  
77 exclude superinfection with these pathogenic alphaviruses.

78

## 79 **Materials and Methods**

### 80 *Cell culture and viruses*

81 *Aedes albopictus* (C7/10) cells [30] were obtained from the World Reference  
82 Center for Emerging Viruses and Arboviruses (WRCEVA). African green monkey  
83 kidney (Vero E6) cells were obtained from the American Type Culture Collection  
84 (ATCC). C7/10 cells were maintained in Dulbecco's minimal essential medium  
85 (DMEM) supplemented with 10% fetal bovine serum (FBS), 1% minimal essential  
86 medium non-essential amino acids, 1% tryptose phosphate broth and 0.05 mg/mL  
87 gentamycin in a 30°C incubator with 5% CO<sub>2</sub>. Vero cells were maintained in DMEM  
88 supplemented with 10% FBS and 0.05 mg/mL gentamycin in a 37°C incubator with  
89 5% CO<sub>2</sub>.

90 Negev virus (NEGV) was rescued in C7/10 cells from an infectious clone as  
91 previously described and without further passage [31]. The sequence was derived  
92 from NEGV strain M30957 isolated from a pool of *Culex coronator* mosquitoes  
93 collected in Harris County, Texas, USA in 2008 [16]. Piura virus (PIUV) strain EVG 7-  
94 47 (PIUV-Culex) isolated from a pool of *Culex nigripalpus* mosquitoes from  
95 Everglades National Park, Florida, USA in 2013 [21]. PIUV EVG 7-47 was passaged  
96 four times in C6/36 cells and obtained from the WRCEVA. PIUV strain CO R 10  
97 (PIUV-Lutzomyia) was isolated from a pool of *Lutzomyia evansi* sandflies caught in

98 Ovejas, Sucre, Colombia in 2013 [21]. The isolate PIUV CO R 10 was passaged twice  
99 in C6/36 cells and also obtained from the WRCEVA. CHIKV isolate 181/25 [32] was  
100 rescued in Vero cells from an infectious clone as previously described [33]. Rescued  
101 CHIKV 181/25 was subsequently passaged once in C7/10 cells and once in Vero E6  
102 cells. Venezuelan equine encephalitis virus (VEEV) vaccine strain, TC-83 [34], was  
103 rescued in baby hamster kidney (BHK) cells from an infectious clone without  
104 further passage.

105

#### 106 *Cloning NEGV for exogenous gene expression*

107 The NEGV infectious clone was used as the backbone to express exogenous  
108 genes. Green fluorescent protein (GFP) or the single chain variable fragment (scFv)  
109 of anti-CHIKV neutralizing antibody CHK265 [35] was inserted on the C-terminal of  
110 ORF3 as either a fusion protein, or with a 2A sequence (EGRGSLTTCGDVEENPGP)  
111 (Figure 1A). The cloned scFv CHK265 sequence contained a N-terminal linker  
112 (LAAQPAMA) for articulation from the viral ORF3 protein, and a domain linker  
113 ((G<sub>4</sub>S)<sub>4</sub>) between the variable heavy (V<sub>H</sub>) and variable light (V<sub>L</sub>) domains  
114 (Integrative DNA Technologies) (Figure 1B). Cloning was performed using In-Fusion  
115 HD Cloning Kit (Takara Bio) as per the manufacturer's protocol. Correct insertion  
116 was confirmed by sequencing. Infectious clones of NEGV containing exogenous  
117 genes were rescued in C7/10 cells as previously described and without further  
118 passage [31].

119

#### 120 *Virus growth curves*

121 Negevirus and alphavirus growth curves were done in C7/10 cells  
122 maintained at 30°C and 5% CO<sub>2</sub>. Negeviruses were inoculated at a multiplicity of  
123 infection (MOI) of 1 or 5. Alphaviruses were inoculated at a MOI of 0.1. Virus was  
124 added to the cells which were incubated at 30°C for one hour. Inoculum was  
125 removed, cells were washed with PBS, and fresh media was added to the wells. Cells  
126 were incubated in a 30°C incubator with 5% CO<sub>2</sub>. Samples were collected in  
127 triplicate at 2-, 6-, 12-, 24- and 48-hours post infection (hpi). Samples were clarified  
128 by centrifugation at 1962 *x g* for 5 minutes. Supernatant was removed and stored at  
129 -80°C until used for plaque assays. Negevirus titers were determined by plaque  
130 assay in C7/10 cells as previously described [31]. Alphavirus titers were determined  
131 by standard plaque assay in Vero E6 cells.

132

### 133 *Negevirus-alphavirus co-infections*

134 C7/10 cells were inoculated with negevirus isolates at a MOI of 1 or 5. The  
135 cells were also inoculated with an alphavirus at a MOI of 0.1 at 0, 2, or 6 hours post  
136 negevirus infection. Media was removed after 1 hour of simultaneous incubation  
137 with negevirus and alphavirus inocula. Cells were then washed with PBS, and fresh  
138 media was added to the wells. Cells were held in a 30°C incubator with 5% CO<sub>2</sub>.  
139 Samples were collected in triplicate at 12-, 24- and 48-hours post alphavirus  
140 infection. Samples were clarified by centrifugation at 1962 *x g* for 5 minutes.  
141 Supernatant was removed and stored at -80°C until used for plaque assays.  
142 Alphavirus titers were determined by standard plaque assay in Vero E6 cells.

143

144 *Statistical analysis*

145 Differences in virus growth curves were determined by two-way ANOVA  
146 followed by Tukey's test. Comparison of NEGV growth curves with different MOIs  
147 was determined by multiple t tests followed by Holm-Sidak method. All statistical  
148 tests were performed using GraphPad Prism 6.0.

149

150 **Results**

151 *Wild-type negevirus growth curves*

152 All wild-type negevirus reached titers greater than  $10\log_{10}$  pfu/mL within  
153 48 hours when infected at a MOI of 1 (Figure 1A). NEGV and PIUV-Lutzomyia neared  
154 peak titer by 12 hours post infection (hpi), while PIUV-Culex neared peak titer at 24  
155 hpi. Infections of NEGV with MOIs of 1 and 5 produced similar growth curves  
156 (Figure 1B).

157

158 *Superinfection exclusion of alphaviruses with wild-type negevirus*

159 To determine the effect of negevirus on the replication of alphaviruses in  
160 cell culture, negevirus isolates were co-infected with VEEV or CHIKV isolates. NEGV  
161 was able to significantly reduce replication of VEEV, with reductions of  $5.5-7.0\log_{10}$   
162 pfu/mL of VEEV at 48 hours (Figure 2A). The MOI of NEGV and timing of VEEV  
163 inoculation had no significant difference on the reduction. Co-infection with PIUV-  
164 Culex or PIUV-Lutzomyia also significantly reduced replication of VEEV across all  
165 time points (Figure 2B-D). A similar reduction of VEEV was observed during all  
166 negevirus co-infections, as VEEV was reduced  $4.6-7.2\log_{10}$  pfu/mL at 48 hours.



167 Co-infections with CHIKV and NEGV also resulted in significantly lower titers  
168 of CHIKV at all time points, but only reducing the titer of CHIKV by 0.65-0.93log<sub>10</sub>  
169 pfu/mL after 48 hours (Figure 3A). Varying the MOI of NEGV and timing of CHIKV  
170 inoculation only produced differing titers of CHIKV at the 12-hour timepoint.  
171 However, titers of CHIKV during co-infection with different negevirus varied  
172 greatly (Figure 3B, C), with the largest variance of CHIKV titers, reductions of  
173 0.7log<sub>10</sub>, 2.4log<sub>10</sub> and 5.3log<sub>10</sub> pfu/mL, observed when inoculated 6 hours post-  
174 inoculation with NEGV, -PIUV-Culex and -PIUV-Lutzomyia, respectively (Figure 3D).

175

#### 176 *Replication of modified NEGV isolates*

177 Sequences for GFP and scFv CHK265, an anti-CHIKV antibody, were cloned as  
178 both fusion- and cleaved proteins on ORF3 of the NEGV infectious clone (Figure 4A).  
179 Mutated isolates were rescued and had titers ranging from 9.6-10.4log<sub>10</sub> pfu/mL,  
180 with similar growth curves to the wild-type NEGV (Figure 4B). Cells infected with  
181 NEGV GFP-fusion demonstrated brilliant, punctate fluorescence (Figure 4C), while  
182 cells infected with NEGV GFP (cleaved) demonstrated dull, diffuse fluorescence  
183 (Figure 4D).

184

#### 185 *Superinfection exclusion of alphaviruses with modified NEGV*

186 NEGV isolates expressing GFP or scFv-CHK265 were used to infect cells for  
187 co-infection with CHIKV. When infected simultaneously, CHIKV titers were reduced  
188 by 0.7-1.1 log<sub>10</sub> pfu/mL during co-infections of NEGV expressing GFP, and by 2.9-  
189 3.8log<sub>10</sub> pfu/mL during co-infections of NEGV expressing scFv-CHK265 at the 48-

190 hour timepoint (Figure 5A). When inoculated 2 hours post NEGV infection, the titer  
191 of CHIKV after 48 hours was reduced 0.7-0.9log<sub>10</sub> pfu/mL with NEGV expressing  
192 GFP and 3.7-4.5log<sub>10</sub> pfu/mL with NEGV expressing scFv-CHK265 (Figure 5B).  
193 Delaying CHIKV infection 6 hours post NEGV resulted in reductions of 1.2-1.9log<sub>10</sub>  
194 pfu/mL and 5.2-5.7log<sub>10</sub> pfu/mL after 48 hours of co-infection with NEGV  
195 expressing GFP and scFv-CHK265, respectively (Figure 5C).

196

## 197 **Discussion**

198 The microbiome of arthropod vectors is known to influence host-pathogen  
199 interactions [36-38]. The precise mechanisms of pathogen inhibition are unknown,  
200 but there is increasing evidence that interference from ISVs is one mechanism [5-7,  
201 10]. Interactions between related viruses has led to the theory of superinfection  
202 exclusion, in which an established infection interferes with or inhibits a secondary  
203 infection by a closely related virus. For example, a CFAV mosquito isolate reduced  
204 the replication of DENV and ZIKV during co-infections in mosquitoes and mosquito  
205 cells [5].

206 To investigate if superinfection exclusion occurred with other virus  
207 combinations, two pathogenic alphaviruses, VEEV and CHIKV, and three  
208 negevirus, NEGV, PIUV-Culex and PIUV-Lutzomyia, were used in co-infection  
209 experiments. While VEEV titers were consistently reduced during all co-infection  
210 experiments with negevirus, reductions varied during CHIKV-negevirus co-  
211 infections. These results provide further evidence that superinfection exclusion of  
212 alphaviruses is pathogen specific. Previous reports demonstrated no reduction in

213 titer of VEEV TC-83 but significant reductions of wild-type VEEV and CHIKV after 48  
214 hours when co-infected with EILV, an alphavirus ISV [11]. However, the potential  
215 for superinfection exclusion of pathogens is different for each ISV, despite their  
216 relatedness. These differences have been demonstrated among several insect-  
217 specific flaviviruses, Nhumirim virus (NHUV) and Palm Creek virus (PCV) were  
218 capable of superinfection exclusion; CFAV gave varying results; and Culex flavivirus  
219 (CxFV) did not reduce titers of pathogenic arboviruses [5-10, 14, 15, 39-42]. In our  
220 experiments, only some of the negeviruses tested were capable of inhibiting  
221 important arboviruses.

222         While ISVs show promising results to block arbovirus replication in  
223 mosquito vectors, their unknown mechanism of action may limit their use against a  
224 wide range of pathogens, but paratransgenic ISVs could be used to provide antiviral  
225 molecules that specifically interfere with pathogen transmission [43]. To this end,  
226 we used an infectious clone of NEGV to deliver a fragment of an antibody known to  
227 neutralize CHIKV. An scFv consists of the variable regions of the heavy and light  
228 chains of an antibody, joined by a soluble linker. These antibody fragments can  
229 possess the neutralizing qualities of their full-size versions in only ~27kDa. Co-  
230 infections with scFv-expressing NEGV isolates greatly reduced titers of CHIKV,  
231 whereas co-infections with control NEGV isolates expressing GFP or wild-type NEGV  
232 only modestly reduced CHIKV titers. The use of parastransgenic NEGV expressing  
233 scFvs demonstrates a novel approach to disrupt pathogen infection in mosquitoes.  
234 This method adapts two existing techniques for pathogen control: *Wolbachia*  
235 infected mosquitoes and the CRISPR-Cas-aided integration of scFv sequences into

236 the mosquito genome. *Wolbachia* is a ubiquitous species of bacteria found in many  
237 insects that has been shown to block replication of some viral pathogens in cell  
238 cultures and mosquitoes. The use of *Wolbachia*-infected vectors has been widely  
239 adapted to curb mosquito-borne viral diseases, propelled by its natural ability to  
240 colonize mosquitoes [44]. Negevirus also possess this attribute, having been  
241 discovered in numerous mosquito species on 6 continents, along with sandflies and  
242 other diverse insect species [19-22, 24]. Insertion of gene-editing scFv sequences  
243 into mosquito genomes has also been used to prevent *Plasmodium* and DENV  
244 infection [45, 46]. By using CRISPR-Cas9 to insert a scFv targeting *Plasmodium*,  
245 infection was blocked in *Anopheles* mosquitoes, and gene drive insured the  
246 production of the scFv in the offspring. In this study, we used scFv expression  
247 strategy by cloning an anti-CHIKV scFv into the NEGV genome. Using NEGV as a  
248 vehicle for paratransgenesis is advantageous, because an isolate can infect multiple  
249 host species, and it is suspected to be vertically transmitted in mosquitoes and in  
250 theory could become established in multiple generations of the infected host species  
251 [16, 21, 47].

252         Modifications to the NEGV genome were tolerated as both cleaved and fusion  
253 proteins. Expression of extraneous proteins in viruses is common with 2A  
254 sequences to produce separate proteins or under a separate subgenomic promoter  
255 [48, 49]. However, extraneous proteins expressed as a fusion with a structural virus  
256 protein is uncommon. ORF3 is ~25kDa and is suspected to be the membrane  
257 protein, the dominant structural protein; and ORF2 is ~40kDa and is the putative  
258 glycoprotein predicted to form a bud projecting from one end of the virion [25]. The

259 viability of the NEG V GFP- or scFv-fusion isolates was surprising because these  
260 inserts double the size of the membrane protein, which must interact with itself and  
261 ultimately support the projection of the glycoprotein. By using NEG V to express  
262 anti-CHIKV scFvs, the cleaved and fused inserts may provide distinct advantages.  
263 Cleaved scFvs are free to be transported around the cell, accessing many different  
264 locations where they may encounter CHIKV proteins. In contrast, fused proteins are  
265 bound to the membrane protein of NEG V and are limited to compartments of the  
266 cell where NEG V proteins are expressed and virions are assembled. In theory,  
267 increasing the concentration of the scFvs in specific areas of the cell, should inhibit  
268 CHIKV virion assembly and egression. By using both cleaved and fused NEG V  
269 isolates, the scFv sequence can also be easily replaced to target a new pathogen,  
270 adding to the versatility of this technique.

271         The current experiments demonstrate the ability of some negevirus, both  
272 wild-type and paratransgenic isolates, to inhibit the replication in mosquito cells  
273 with co-infected arboviruses. The obvious next question is whether genetically  
274 altered negevirus will survive and replicate in live mosquitoes; and if so, will they  
275 be vertically transmitted or transovarially transmitted in the insects? This will be  
276 our next area of investigation. If successful, then the use of paratransgenic  
277 negevirus could be another novel method to alter the vector competence of  
278 mosquitoes for selected arboviruses.

279

280 **Acknowledgements**

281 E.I.P. was supported by the Liverpool School of Tropical Medicine Director's Catalyst  
282 Fund award. N.L.F. was supported by the NIH R01-AI095753-01A1 and R01-  
283 AI125902. G.L.H. was supported by the BBSRC (BB/T001240/1), the Royal Society  
284 Wolfson Fellowship (RSWF\R1\180013), NIH grants (R21AI138074 and  
285 R21AI129507), URKI (20197), and the NIHR (NIHR2000907).

286

## 287 **References**

288

- 289 1. Calisher CH, Higgs S. The Discovery of Arthropod-Specific Viruses in  
290 Hematophagous Arthropods: An Open Door to Understanding the Mechanisms of  
291 Arbovirus and Arthropod Evolution? *Annu Rev Entomol.* 2018;63:87-103. Epub  
292 2018/01/13. doi: 10.1146/annurev-ento-020117-043033. PubMed PMID:  
293 29324047.
  
- 294 2. Ledermann JP, Suchman EL, Black WCt, Carlson JO. Infection and  
295 pathogenicity of the mosquito densoviruses AeDENV, HeDENV, and APeDENV in *Aedes*  
296 *aegypti* mosquitoes (Diptera: Culicidae). *J Econ Entomol.* 2004;97(6):1828-35. Epub  
297 2005/01/26. doi: 10.1093/jee/97.6.1828. PubMed PMID: 15666733.
  
- 298 3. Carlson J, Suchman E, Buchatsky L. Densoviruses for control and genetic  
299 manipulation of mosquitoes. *Adv Virus Res.* 2006;68:361-92. Epub 2006/09/26.  
300 doi: 10.1016/S0065-3527(06)68010-X. PubMed PMID: 16997017.

- 301 4. Hirunkanokpun S, Carlson JO, Kittayapong P. Evaluation of mosquito  
302 densovirus for controlling *Aedes aegypti* (Diptera: Culicidae): variation in  
303 efficiency due to virus strain and geographic origin of mosquitoes. *Am J Trop Med*  
304 *Hyg.* 2008;78(5):784-90. Epub 2008/05/07. PubMed PMID: 18458314.
- 305 5. Baidaliuk A, Miot EF, Lequime S, Moltini-Conclois I, Delaigue F, Dabo S, et al.  
306 Cell-Fusing Agent Virus Reduces Arbovirus Dissemination in *Aedes aegypti*  
307 Mosquitoes In Vivo. *J Virol.* 2019;93(18). Epub 2019/06/28. doi:  
308 10.1128/JVI.00705-19. PubMed PMID: 31243123; PubMed Central PMCID:  
309 PMC6714787.
- 310 6. Goenaga S, Kenney JL, Duggal NK, Delorey M, Ebel GD, Zhang B, et al.  
311 Potential for Co-Infection of a Mosquito-Specific Flavivirus, Nhumirim Virus, to  
312 Block West Nile Virus Transmission in Mosquitoes. *Viruses.* 2015;7(11):5801-12.  
313 Epub 2015/11/17. doi: 10.3390/v7112911. PubMed PMID: 26569286; PubMed  
314 Central PMCID: PMC4664984.
- 315 7. Hall-Mendelin S, McLean BJ, Bielefeldt-Ohmann H, Hobson-Peters J, Hall RA,  
316 van den Hurk AF. The insect-specific Palm Creek virus modulates West Nile virus  
317 infection in and transmission by Australian mosquitoes. *Parasit Vectors.*  
318 2016;9(1):414. Epub 2016/07/28. doi: 10.1186/s13071-016-1683-2. PubMed  
319 PMID: 27457250; PubMed Central PMCID: PMC4960669.

- 320 8. Hobson-Peters J, Yam AW, Lu JW, Setoh YX, May FJ, Kurucz N, et al. A new  
321 insect-specific flavivirus from northern Australia suppresses replication of West  
322 Nile virus and Murray Valley encephalitis virus in co-infected mosquito cells. *PLoS*  
323 *One*. 2013;8(2):e56534. Epub 2013/03/06. doi: 10.1371/journal.pone.0056534.  
324 PubMed PMID: 23460804; PubMed Central PMCID: PMC3584062.
- 325 9. Kenney JL, Solberg OD, Langevin SA, Brault AC. Characterization of a novel  
326 insect-specific flavivirus from Brazil: potential for inhibition of infection of  
327 arthropod cells with medically important flaviviruses. *J Gen Virol*. 2014;95(Pt  
328 12):2796-808. Epub 2014/08/26. doi: 10.1099/vir.0.068031-0. PubMed PMID:  
329 25146007; PubMed Central PMCID: PMC4582674.
- 330 10. Romo H, Kenney JL, Blitvich BJ, Brault AC. Restriction of Zika virus infection  
331 and transmission in *Aedes aegypti* mediated by an insect-specific flavivirus. *Emerg*  
332 *Microbes Infect*. 2018;7(1):181. Epub 2018/11/16. doi: 10.1038/s41426-018-0180-  
333 4. PubMed PMID: 30429457; PubMed Central PMCID: PMC6235874.
- 334 11. Nasar F, Erasmus JH, Haddow AD, Tesh RB, Weaver SC. Eilat virus induces  
335 both homologous and heterologous interference. *Virology*. 2015;484:51-8. Epub  
336 2015/06/13. doi: 10.1016/j.virol.2015.05.009. PubMed PMID: 26068885; PubMed  
337 Central PMCID: PMC4567418.
- 338 12. Burivong P, Pattanakitsakul SN, Thongrunkiat S, Malasit P, Flegel TW.  
339 Markedly reduced severity of Dengue virus infection in mosquito cell cultures



- 340 persistently infected with *Aedes albopictus* densovirus (AalDNV). *Virology*.  
341 2004;329(2):261-9. Epub 2004/11/03. doi: 10.1016/j.virol.2004.08.032. PubMed  
342 PMID: 15518806.
- 343 13. Schultz MJ, Frydman HM, Connor JH. Dual Insect specific virus infection limits  
344 Arbovirus replication in *Aedes* mosquito cells. *Virology*. 2018;518:406-13. Epub  
345 2018/04/07. doi: 10.1016/j.virol.2018.03.022. PubMed PMID: 29625404.
- 346 14. Zhang G, Asad S, Khromykh AA, Asgari S. Cell fusing agent virus and dengue  
347 virus mutually interact in *Aedes aegypti* cell lines. *Sci Rep*. 2017;7(1):6935. Epub  
348 2017/08/02. doi: 10.1038/s41598-017-07279-5. PubMed PMID: 28761113;  
349 PubMed Central PMCID: PMC5537255.
- 350 15. Bolling BG, Olea-Popelka FJ, Eisen L, Moore CG, Blair CD. Transmission  
351 dynamics of an insect-specific flavivirus in a naturally infected *Culex pipiens*  
352 laboratory colony and effects of co-infection on vector competence for West Nile  
353 virus. *Virology*. 2012;427(2):90-7. Epub 2012/03/20. doi:  
354 10.1016/j.virol.2012.02.016. PubMed PMID: 22425062; PubMed Central PMCID:  
355 PMCPMC3329802.
- 356 16. Vasilakis N, Forrester NL, Palacios G, Nasar F, Savji N, Rossi SL, et al.  
357 Negevirus: a proposed new taxon of insect-specific viruses with wide geographic  
358 distribution. *J Virol*. 2013;87(5):2475-88. Epub 2012/12/21. doi:

- 359 10.1128/JVI.00776-12. PubMed PMID: 23255793; PubMed Central PMCID:  
360 PMCPMC3571365.
- 361 17. Carapeta S, do Bem B, McGuinness J, Esteves A, Abecasis A, Lopes A, et al.  
362 Negevirus found in multiple species of mosquitoes from southern Portugal:  
363 Isolation, genetic diversity, and replication in insect cell culture. *Virology*.  
364 2015;483:318-28. Epub 2015/06/10. doi: 10.1016/j.virol.2015.04.021. PubMed  
365 PMID: 26057025.
- 366 18. Charles J, Tangudu CS, Hurt SL, Tumescheit C, Firth AE, Garcia-Rejon JE, et al.  
367 Detection of novel and recognized RNA viruses in mosquitoes from the Yucatan  
368 Peninsula of Mexico using metagenomics and characterization of their in vitro host  
369 ranges. *J Gen Virol*. 2018;99(12):1729-38. Epub 2018/11/10. doi:  
370 10.1099/jgv.0.001165. PubMed PMID: 30412047; PubMed Central PMCID:  
371 PMCPMC6537628.
- 372 19. Kondo H, Chiba S, Maruyama K, Andika IB, Suzuki N. A novel insect-infecting  
373 virga/nege-like virus group and its pervasive endogenization into insect genomes.  
374 *Virus Res*. 2019;262:37-47. Epub 2017/11/25. doi: 10.1016/j.virusres.2017.11.020.  
375 PubMed PMID: 29169832.
- 376 20. Kondo H, Fujita M, Hisano H, Hyodo K, Andika IB, Suzuki N. Virome Analysis  
377 of Aphid Populations That Infest the Barley Field: The Discovery of Two Novel  
378 Groups of Nege/Kita-Like Viruses and Other Novel RNA Viruses. *Front Microbiol*.

379 2020;11:509. Epub 2020/04/23. doi: 10.3389/fmicb.2020.00509. PubMed PMID:  
380 32318034; PubMed Central PMCID: PMC7154061.

381 21. Nunes MRT, Contreras-Gutierrez MA, Guzman H, Martins LC, Barbirato MF,  
382 Savit C, et al. Genetic characterization, molecular epidemiology, and phylogenetic  
383 relationships of insect-specific viruses in the taxon Negevirus. *Virology*.  
384 2017;504:152-67. Epub 2017/02/15. doi: 10.1016/j.virol.2017.01.022. PubMed  
385 PMID: 28193550; PubMed Central PMCID: PMC5394984.

386 22. De Miranda JRH, H.; Onorati, P.; Stephan, J.; Karlberg, O.; Bylund, H.; Terenius,  
387 O. Characterization of a Novel RNA Virus Discovered in the Autumnal Moth *Epirrita*  
388 *autumnata* in Sweden. *Viruses*. 2017;9. doi: <https://doi.org/10.3390/v9080214>.

389 23. Kallies R, Kopp A, Zirkel F, Estrada A, Gillespie TR, Drosten C, et al. Genetic  
390 characterization of goutanap virus, a novel virus related to negeviruses, cileviruses  
391 and higreviruses. *Viruses*. 2014;6(11):4346-57. Epub 2014/11/15. doi:  
392 10.3390/v6114346. PubMed PMID: 25398046; PubMed Central PMCID:  
393 PMC4246226.

394 24. Lu G, Ye ZX, He YJ, Zhang Y, Wang X, Huang HJ, et al. Discovery of Two Novel  
395 Negeviruses in a Dungfly Collected from the Arctic. *Viruses*. 2020;12(7). Epub  
396 2020/07/02. doi: 10.3390/v12070692. PubMed PMID: 32604989.

- 397 25. Colmant AMG, O'Brien CA, Newton ND, Watterson D, Hardy J, Coulibaly F, et  
398 al. Novel monoclonal antibodies against Australian strains of negevirus and  
399 insights into virus structure, replication and host -restriction. *J Gen Virol.*  
400 2020;101(4):440-52. Epub 2020/02/01. doi: 10.1099/jgv.0.001388. PubMed PMID:  
401 32003709.
- 402 26. Nabeshima T, Inoue S, Okamoto K, Posadas-Herrera G, Yu F, Uchida L, et al.  
403 Tanay virus, a new species of virus isolated from mosquitoes in the Philippines. *J*  
404 *Gen Virol.* 2014;95(Pt 6):1390-5. Epub 2014/03/22. doi: 10.1099/vir.0.061887-0.  
405 PubMed PMID: 24646751.
- 406 27. O'Brien CA, McLean BJ, Colmant AMG, Harrison JJ, Hall-Mendelin S, van den  
407 Hurk AF, et al. Discovery and Characterisation of Castlerea Virus, a New Species of  
408 Negevirus Isolated in Australia. *Evol Bioinform Online.*  
409 2017;13:1176934317691269. Epub 2017/05/05. doi:  
410 10.1177/1176934317691269. PubMed PMID: 28469377; PubMed Central PMCID:  
411 PMC5395271.
- 412 28. Shi M, Neville P, Nicholson J, Eden JS, Imrie A, Holmes EC. High-Resolution  
413 Metatranscriptomics Reveals the Ecological Dynamics of Mosquito-Associated RNA  
414 Viruses in Western Australia. *J Virol.* 2017;91(17). Epub 2017/06/24. doi:  
415 10.1128/JVI.00680-17. PubMed PMID: 28637756; PubMed Central PMCID:  
416 PMC5553174.

- 417 29. Atoni E, Wang Y, Karungu S, Waruhiu C, Zohaib A, Obanda V, et al.  
418 Metagenomic Virome Analysis of Culex Mosquitoes from Kenya and China. *Viruses*.  
419 2018;10(1). Epub 2018/01/13. doi: 10.3390/v10010030. PubMed PMID:  
420 29329230; PubMed Central PMCID: PMC5795443.
- 421 30. Walker T, Jeffries CL, Mansfield KL, Johnson N. Mosquito cell lines: history,  
422 isolation, availability and application to assess the threat of arboviral transmission  
423 in the United Kingdom. *Parasit Vectors*. 2014;7:382. Epub 2014/08/22. doi:  
424 10.1186/1756-3305-7-382. PubMed PMID: 25141888; PubMed Central PMCID:  
425 PMC4150944.
- 426 31. Gorchakov RV, Tesh RB, Weaver SC, Nasar F. Generation of an infectious  
427 Negev virus cDNA clone. *J Gen Virol*. 2014;95(Pt 9):2071-4. Epub 2014/06/01. doi:  
428 10.1099/vir.0.066019-0. PubMed PMID: 24878640; PubMed Central PMCID:  
429 PMC4135092.
- 430 32. Levitt NH, Ramsburg HH, Hasty SE, Repik PM, Cole FE, Jr., Lupton HW.  
431 Development of an attenuated strain of chikungunya virus for use in vaccine  
432 production. *Vaccine*. 1986;4(3):157-62. Epub 1986/09/01. doi: 10.1016/0264-  
433 410x(86)90003-4. PubMed PMID: 3020820.
- 434 33. Smith DR, Adams AP, Kenney JL, Wang E, Weaver SC. Venezuelan equine  
435 encephalitis virus in the mosquito vector *Aedes taeniorhynchus*: infection initiated  
436 by a small number of susceptible epithelial cells and a population bottleneck.

437 Virology. 2008;372(1):176-86. Epub 2007/11/21. doi: 10.1016/j.virol.2007.10.011.

438 PubMed PMID: 18023837; PubMed Central PMCID: PMCPMC2291444.

439 34. Kinney RM, Chang GJ, Tsuchiya KR, Sneider JM, Roehrig JT, Woodward TM, et

440 al. Attenuation of Venezuelan equine encephalitis virus strain TC-83 is encoded by

441 the 5'-noncoding region and the E2 envelope glycoprotein. J Virol. 1993;67(3):1269-

442 77. Epub 1993/03/01. doi: 10.1128/JVI.67.3.1269-1277.1993. PubMed PMID:

443 7679745; PubMed Central PMCID: PMCPMC237493.

444 35. Fox JM, Long F, Edeling MA, Lin H, van Duijl-Richter MKS, Fong RH, et al.

445 Broadly Neutralizing Alphavirus Antibodies Bind an Epitope on E2 and Inhibit Entry

446 and Egress. Cell. 2015;163(5):1095-107. Epub 2015/11/11. doi:

447 10.1016/j.cell.2015.10.050. PubMed PMID: 26553503; PubMed Central PMCID:

448 PMCPMC4659373.

449 36. Cross ST, Kapuscinski ML, Perino J, Maertens BL, Weger-Lucarelli J, Ebel GD,

450 et al. Co-Infection Patterns in Individual Ixodes scapularis Ticks Reveal Associations

451 between Viral, Eukaryotic and Bacterial Microorganisms. Viruses. 2018;10(7). Epub

452 2018/07/25. doi: 10.3390/v10070388. PubMed PMID: 30037148; PubMed Central

453 PMCID: PMCPMC6071216.

454 37. Hegde S, Khanipov K, Albayrak L, Golovko G, Pimenova M, Saldana MA, et al.

455 Microbiome Interaction Networks and Community Structure From Laboratory-

456 Reared and Field-Collected *Aedes aegypti*, *Aedes albopictus*, and *Culex*

- 457 quinquefasciatus Mosquito Vectors. *Front Microbiol.* 2018;9:2160. Epub  
458 2018/09/27. doi: 10.3389/fmicb.2018.02160. PubMed PMID: 30250462; PubMed  
459 Central PMCID: PMC6140713.
- 460 38. Nanfack-Minkeu F, Mitri C, Bischoff E, Belda E, Casademont I, Vernick KD.  
461 Interaction of RNA viruses of the natural virome with the African malaria vector,  
462 *Anopheles coluzzii*. *Sci Rep.* 2019;9(1):6319. Epub 2019/04/21. doi:  
463 10.1038/s41598-019-42825-3. PubMed PMID: 31004099; PubMed Central PMCID:  
464 PMC6474895.
- 465 39. Kuwata R, Isawa H, Hoshino K, Sasaki T, Kobayashi M, Maeda K, et al. Analysis  
466 of Mosquito-Borne Flavivirus Superinfection in *Culex tritaeniorhynchus* (Diptera:  
467 Culicidae) Cells Persistently Infected with *Culex Flavivirus* (Flaviviridae). *J Med*  
468 *Entomol.* 2015;52(2):222-9. Epub 2015/09/04. doi: 10.1093/jme/tju059. PubMed  
469 PMID: 26336307.
- 470 40. Newman CM, Krebs BL, Anderson TK, Hamer GL, Ruiz MO, Brawn JD, et al.  
471 *Culex Flavivirus* During West Nile Virus Epidemic and Interepidemic Years in  
472 Chicago, United States. *Vector Borne Zoonotic Dis.* 2017;17(8):567-75. Epub  
473 2017/06/20. doi: 10.1089/vbz.2017.2124. PubMed PMID: 28628366; PubMed  
474 Central PMCID: PMC5564057.
- 475 41. Talavera S, Birnberg L, Nunez AI, Munoz-Munoz F, Vazquez A, Busquets N.  
476 *Culex flavivirus* infection in a *Culex pipiens* mosquito colony and its effects on vector

477 competence for Rift Valley fever phlebovirus. *Parasit Vectors*. 2018;11(1):310. Epub  
478 2018/05/25. doi: 10.1186/s13071-018-2887-4. PubMed PMID: 29792223; PubMed  
479 Central PMCID: PMCPMC5966921.

480 42. Kent RJ, Crabtree MB, Miller BR. Transmission of West Nile virus by *Culex*  
481 *quinquefasciatus* say infected with *Culex* Flavivirus Izabal. *PLoS Negl Trop Dis*.  
482 2010;4(5):e671. Epub 2010/05/11. doi: 10.1371/journal.pntd.0000671. PubMed  
483 PMID: 20454569; PubMed Central PMCID: PMCPMC2864301.

484 43. Patterson EI, Villinger J, Muthoni JN, Dobel-Ober L, Hughes GL. Exploiting  
485 insect-specific viruses as a novel strategy to control vector-borne disease. *Curr Opin*  
486 *Insect Sci*. 2020;39:50-6. Epub 2020/04/12. doi: 10.1016/j.cois.2020.02.005.  
487 PubMed PMID: 32278312; PubMed Central PMCID: PMCPMC7302987.

488 44. Jiggins FM. The spread of *Wolbachia* through mosquito populations. *PLoS*  
489 *Biol*. 2017;15(6):e2002780. Epub 2017/06/02. doi: 10.1371/journal.pbio.2002780.  
490 PubMed PMID: 28570608; PubMed Central PMCID: PMCPMC5453404.

491 45. Gantz VM, Jasinskiene N, Tatarenkova O, Fazekas A, Macias VM, Bier E, et al.  
492 Highly efficient Cas9-mediated gene drive for population modification of the malaria  
493 vector mosquito *Anopheles stephensi*. *Proc Natl Acad Sci U S A*.  
494 2015;112(49):E6736-43. Epub 2015/11/26. doi: 10.1073/pnas.1521077112.  
495 PubMed PMID: 26598698; PubMed Central PMCID: PMCPMC4679060.



- 496 46. Buchman A, Gamez S, Li M, Antoshechkin I, Li HH, Wang HW, et al. Broad  
497 dengue neutralization in mosquitoes expressing an engineered antibody. PLoS  
498 Pathog. 2020;16(1):e1008103. Epub 2020/01/17. doi:  
499 10.1371/journal.ppat.1008103. PubMed PMID: 31945137; PubMed Central PMCID:  
500 PMCPMC6964813 J.E.C. has served as a consultant for Takeda Vaccines, Sanofi  
501 Pasteur, Pfizer, and Novavax, is on the Scientific Advisory Boards of CompuVax,  
502 GigaGen, Meissa Vaccines, and is the Founder of IDBiologics, Inc. All other authors  
503 declare no competing financial interests.
- 504 47. Kawakami K, Kurnia YW, Fujita R, Ito T, Isawa H, Asano S, et al.  
505 Characterization of a novel negevirus isolated from Aedes larvae collected in a  
506 subarctic region of Japan. Arch Virol. 2016;161(4):801-9. Epub 2015/12/22. doi:  
507 10.1007/s00705-015-2711-9. PubMed PMID: 26687585.
- 508 48. Kautz TF, Jaworski E, Routh A, Forrester NL. A Low Fidelity Virus Shows  
509 Increased Recombination during the Removal of an Alphavirus Reporter Gene.  
510 Viruses. 2020;12(6). Epub 2020/06/25. doi: 10.3390/v12060660. PubMed PMID:  
511 32575413; PubMed Central PMCID: PMCPMC7354468.
- 512 49. Suzuki Y, Niu G, Hughes GL, Rasgon JL. A viral over-expression system for the  
513 major malaria mosquito *Anopheles gambiae*. Sci Rep. 2014;4:5127. Epub  
514 2014/05/31. doi: 10.1038/srep05127. PubMed PMID: 24875042; PubMed Central  
515 PMCID: PMCPMC4038844.

516

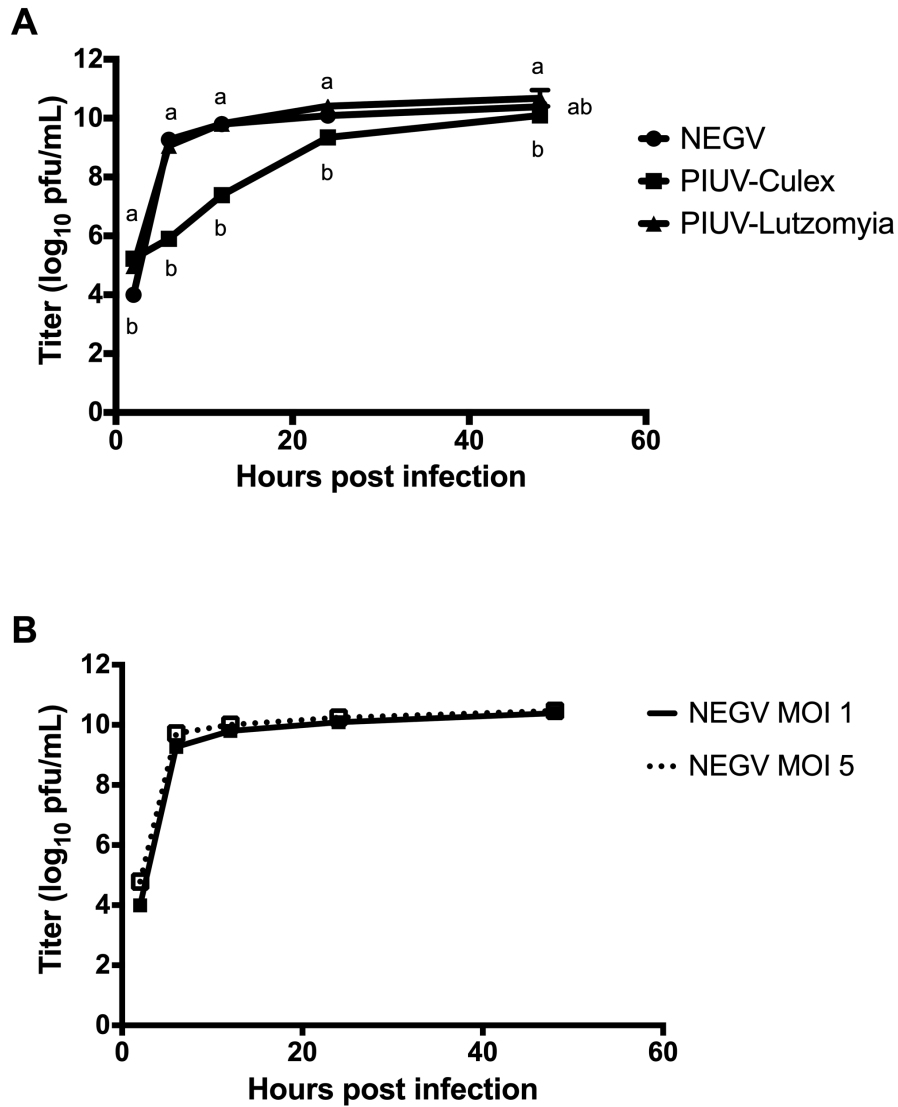

517

518 Figure 1. Growth curve for wild-type negeviruses. A) The titer of each virus, Negev virus (NEGV), Piura virus-  
519 Culex (PIUV-Culex) and Piura virus-Lutzomyia (PIUV-Lutzomyia) at different time points following infection at  
520 MOI of 1 in C7/10 cells. B) Growth curve of NEGVM with MOI of 1 and 5 in C7/10 cells. All points represent mean  
521 of n=3, ± SD. Letters indicate significant differences ( $p < 0.0001$ ).

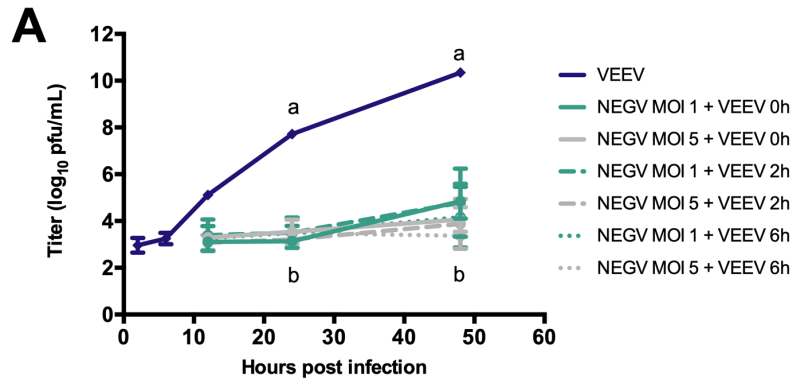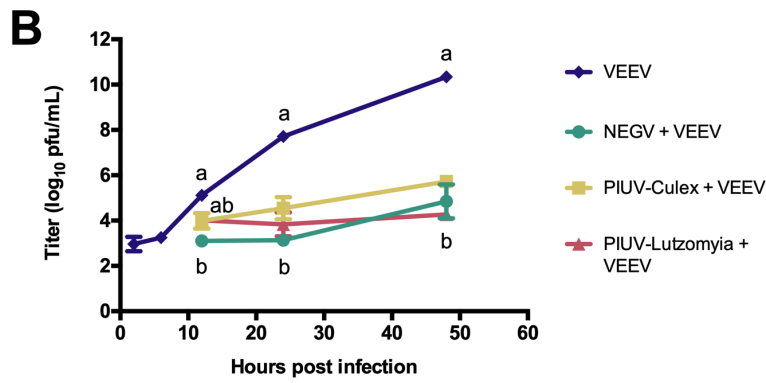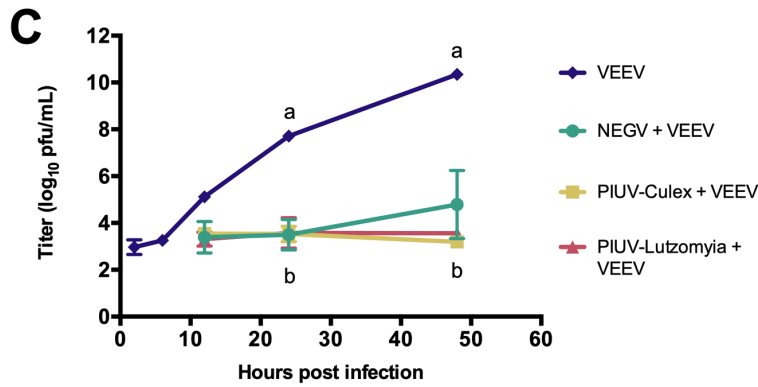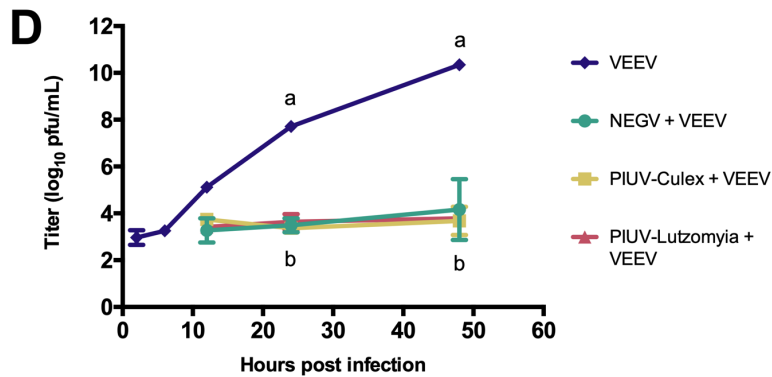

523 Figure 2. Growth curves of VEEV in C7/10 cells during co-infections with wild-type negevirus. A) Growth  
524 curves of VEEV when inoculated on cells at 0-, 2- and 6 hours post NEG V infections. NEG V was inoculated at MOI  
525 1 or 5. B) Growth curves of VEEV when inoculated on cells at 0 hours post negevirus infection, C) 2 hours post  
526 negevirus infection, and D) 6 hours post negevirus infection. Negevirus were inoculated at MOI of 1. All points  
527 represent mean of n=3, ± SD. Letters indicate significant differences (p < 0.0001).

528

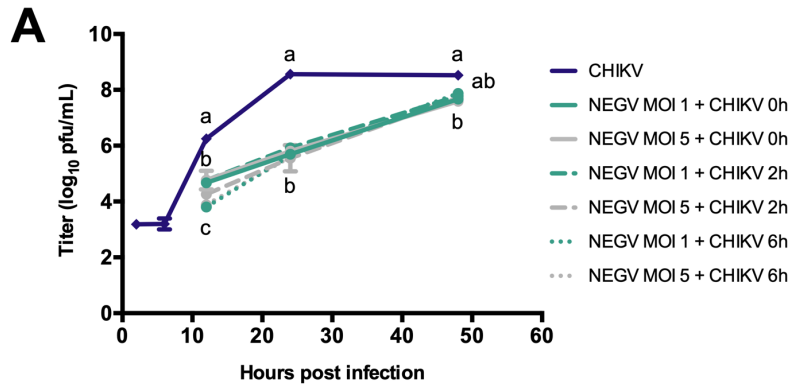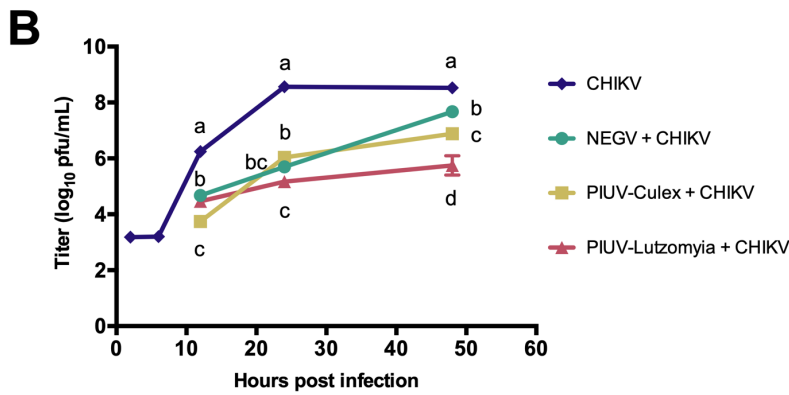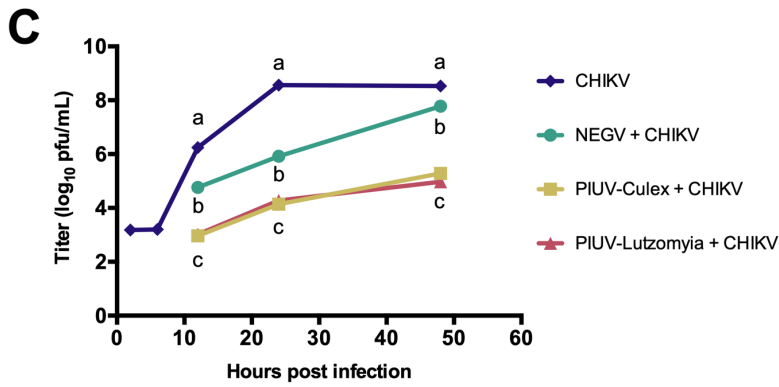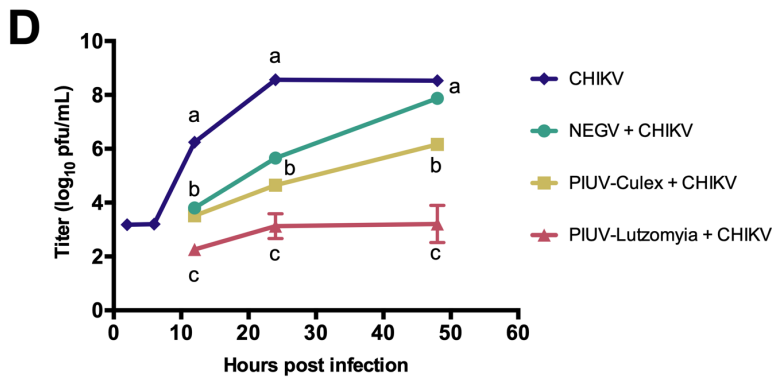

530 Figure 3. Growth curves of CHIKV in C7/10 cells during co-infections with wild-type negeviruses. A) Growth  
531 curves of CHIKV when inoculated on cells at 0-, 2- and 6 hours post NEGV infections. NEGV was inoculated at  
532 MOI 1 or 5. B) Growth curves of CHIKV when inoculated on cells at 0 hours post negevirus infection, C) 2 hours  
533 post negevirus infection, and D) 6 hours post negevirus infection. Negeviruses were inoculated at MOI of 1. All  
534 points represent mean of n=3,  $\pm$  SD. Letters indicate significant differences ( $p < 0.0001$ ).

535

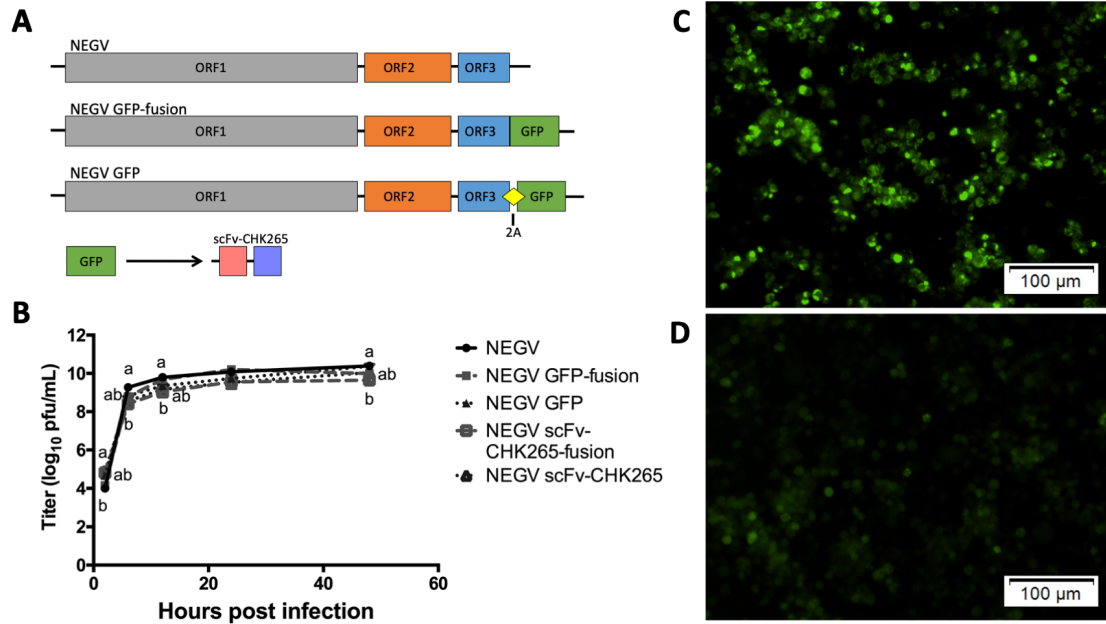

536

537 Figure 4. Rescued paratransgenic NEG V infectious clones. A) Schematic of NEG V genomes for wild-type, and  
538 GFP-expressing viruses. NEG V GFP-fusion added the GFP sequence onto ORF3 and NEG V GFP separated the  
539 ORF3 and GFP with a 2A sequence to produce the proteins separately. GFP was replaced by scFv-CHK265 for  
540 NEG V scFv-CHK265-fusion and NEG V scFv-CHK265. B) Growth curves of NEG V wild-type and NEG V mutants  
541 expressing GFP or scFv-CHK265. All points represent mean of n=3, ± SD. Letters indicate significant differences  
542 (p < 0.0001). C) Fluorescent microscopy of C7/10 cells infected with NEG V GFP-fusion. Cells demonstrate  
543 brilliant, punctate fluorescence. D) Fluorescent microscopy of C7/10 cells infected with NEG V GFP. Cells  
544 demonstrate dull, diffuse fluorescence.

545

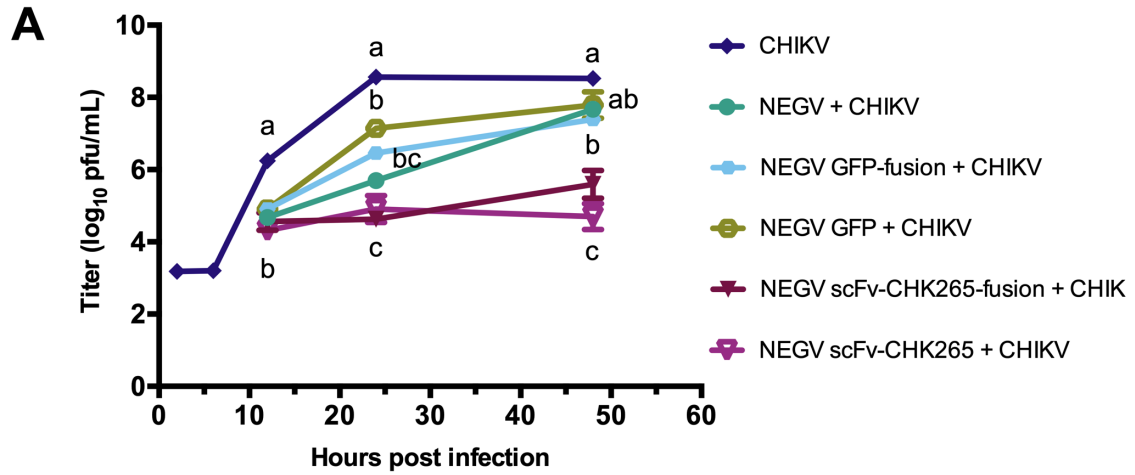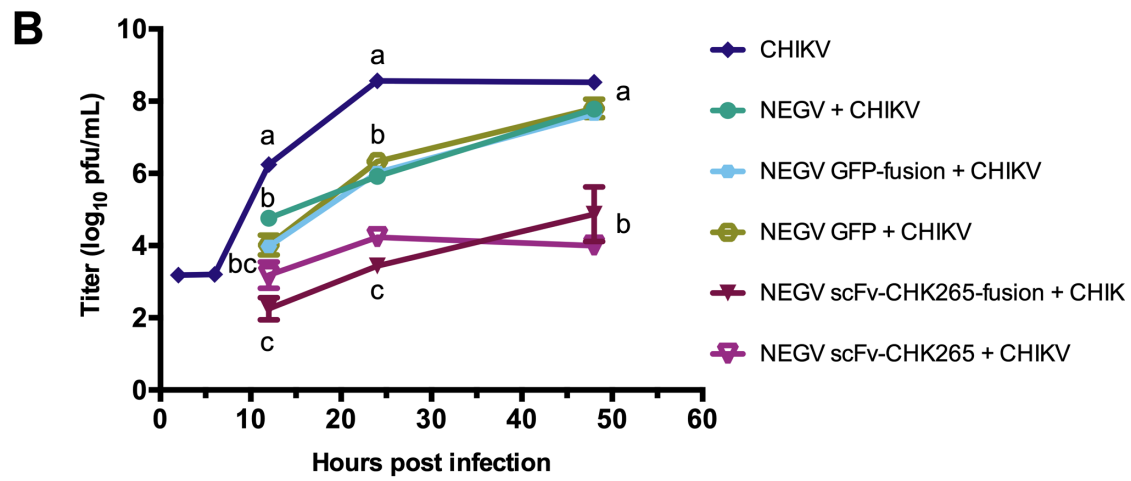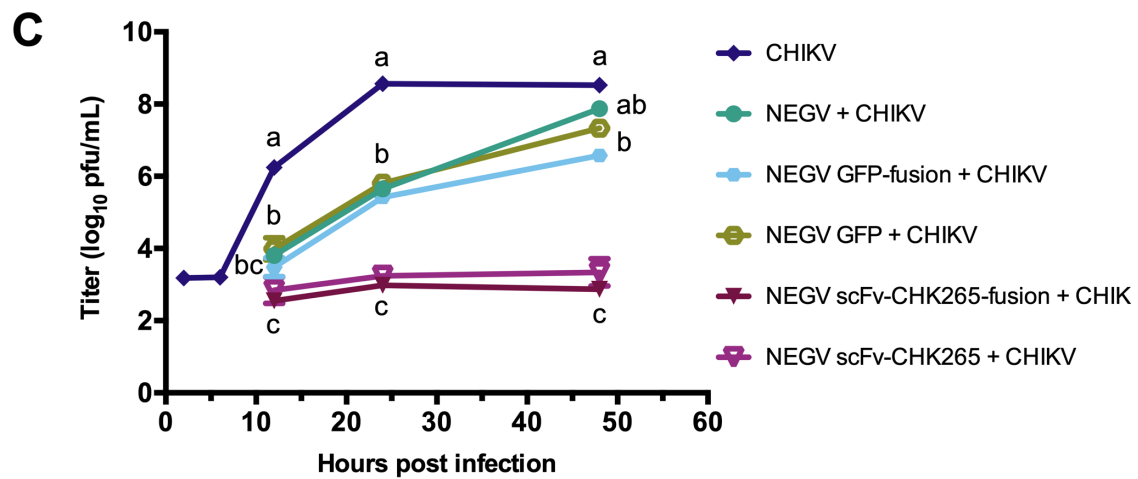



547 Figure 5. Growth curves of CHIKV during co-infections with paratransgenic NEG. Growth curves of CHIKV when  
548 inoculated on cells at A) 0 hours post NEG infection, C) 2 hours post NEG infection, and D) 6 hours post NEG  
549 infection. All NEG isolates were inoculated at MOI of 1. All points represent mean of n=3,  $\pm$  SD. Letters indicate  
550 significant differences ( $p < 0.0001$ ).

551
